# Supplementary material
Source: ML conference proceedings conference paper supplement (https://openreview.net/forum?id=ueBmGhLOXP)
Supplement: supplementary_material [file attachment]

# Supplementary Materials – EquiBot: SIM(3)-Equivariant Diffusion Policy for Generalizable and Data Efficient Learning

Anonymous Author(s)

Affiliation

Address

email

## A Detailed Discussion of Related Works

**Imitation learning from 3D inputs.** While many imitation learning works assume RGB images as visual observations [1, 2, 3, 4], some works, similar to the design choice of our work, assume 3D point clouds or depth inputs to their methods. Recently, Ze et al. [5] proposed *3D Diffusion Policy*, a depth-only variant of diffusion policy for visuomotor policy learning. Their method is very similar to our *DP* baseline, with two differences: (1) they use a simpler *DP3 encoder* in their work; (2) they use a 2-layer MLP to encode the robot proprioceptive states before concatenating with the point cloud representation.

In Figure 1, we show quantitative comparison results between our method and baselines related to [5]. As in our main paper results, we run 3 seeds of training runs, each for 2,000 epochs, for all experiments. We evaluate the last 5 checkpoints for each training run and collect the final task reward for 10 episodes in each evaluation. Comparisons show that [5] displays similar performance as the *DP* baseline in the main paper, performing very well in in-distribution setups and poorly in out-of-distribution setups.

We also show that [5] can be easily integrated with our method by switching our PointNet-based encoder to the *DP3 encoder*. In Figure 1, we show a comparison between our method and a variation of our method with a modification of the *DP3 encoder* to make it  $SO(3)$ -equivariant. Results show that the *DP3* variant has slightly lower but comparable performance as our method in the Cloth Folding task.

**Equivariant diffusion architectures.** Prior works have integrated equivariance in diffusion models in various non-robotics domains, including molecule generation [6, 7, 8] and drug design [9]. Some works have attempted to integrate equivariant architectures in diffusion models for robotics [10, 11]. Diffusion-EDFs [10] take point cloud observations as input and output a single target end-effector pose. This formulation makes the work only applicable to pick-and-place tasks. EDGI [11] proposed an open-loop policy and showed it in simple 2D tasks only. Compared to prior works, our work proposes an equivariant diffusion policy that supports closed-loop 3D manipulation tasks.

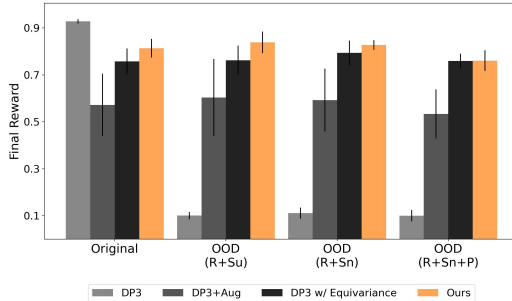

Figure 1: **Comparisons with DP3-related architectures in the Cloth Folding task.** We compare with three different baselines: (1) *DP3* is a variation of the *DP* baseline with the PointNet-based encoder replaced by the *DP3 encoder* proposed in [5], with the code of *DP3 encoder* copied verbatim from the public codebase; (2) *DP3+Aug* is a variant of the *DP3* baseline trained with augmentations that are the same as the *DP+Aug* baseline in the main paper; (3) *DP3 w/ Equivariance* is the integration of *DP3* into our method.

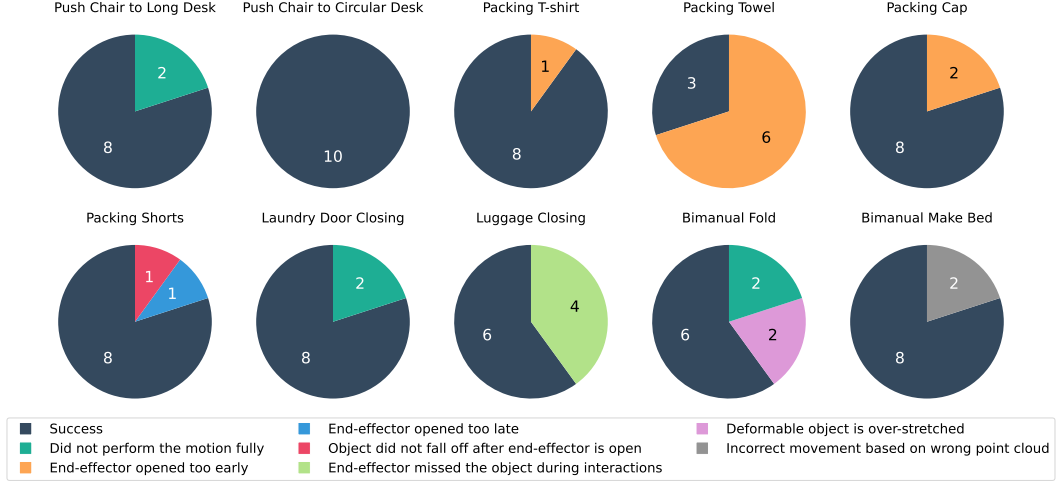

Figure 2: **Failure cases of our method during real robot executions.** The pie charts show failure breakdown in every real robot task variation. The navy color denotes success, while other colors denote different types of failures. Each pie chart shoes a total of 10 trials since we run 10 episodes per evaluation.

**Additional works in equivariant architectures for robot manipulation.** Aside from prior equivariant architectures for robot manipulation introduced in the main paper, there are also robotics works that attempt to utilize equivariance in various setups. Some works [12, 13] attempt to use equivariance in a pick-and-place setup, while others [14, 15] propose  $SO(2)$ -equivariant robot policies for tabletop manipulation tasks. In comparison to prior works, our proposed architecture is equivariant to position, orientation, and uniform scaling. In addition, our method can be applied in various 3D manipulation tasks that involve rigid, deformable, and articulated objects.

## B Limitations

### B.1 Limitations of Our Method

In the paper, we mentioned the limitations of the method as well as the assumptions the method has to make about the input and output of the model. Here, we expand further on the limitations of our method.

While our method can generalize to scenes with unseen object positions, scales, and orientations, it does not generalize automatically to the following unseen scenarios: (1) there are multiple objects in the scene and their relative positioning varies at evaluation time; (2) object dynamics change (eg. cloth is more rigid at test time, thus resulting in a point cloud that has unseen shapes); (3) non-uniform scaling of objects; (4) unseen object shapes beyond simple scaling (eg. an unseen handle position of a cup). Although these limitations exist, it is important to mention two facts. First, our method strictly generalizes more than a vanilla Diffusion Policy, which our method is built on top of. Second, we can always collect demonstrations with varied object dynamics, relative positioning, and local shapes to make the resulting policy generalize to these aspects.

To make our method generalize out-of-distribution in the relative positioning of objects, object dynamics, etc., future works can consider adding inductive biases in these aspects in the architecture of the model. For example, one can consider explicitly modeling multiple objects in the model to handle unseen relative positioning of different objects. One can also consider explicitly modeling environment dynamics in an equivariant dynamics model to cope with unseen object dynamics. These directions are all interesting avenues for future work.

## 64 B.2 Failure Analysis

65 Although our method outperforms vanilla Diffusion Policy [4] and prior equivariant visuomotor  
66 policy architectures, our method still presents various failure cases. Below, we focus our analysis  
67 on execution failure of our method in the real robot experiments. In Figure 2, we show the failure  
68 breakdown of all real robot executions we have performed with our method.

69 In most packing tasks (packing t-shirt, towel, and cap), the main failure cases are the end-effector  
70 opening too early. We believe this is because the out-of-distribution scenarios resulted in the agent  
71 thinking that it has moved to the dropping location for the object and opened the end-effector. For  
72 the packing shorts task variation, half of the failures come from end-effector opening too late, and  
73 half of the failures come from the shorts not slipping off from the end-effector due to the friction of  
74 the end-effector. The failure to slip off happened because the shorts is a small deformable object that  
75 easily hangs itself onto the end-effectors. This problem can potentially be solved by designing end-  
76 effectors that can handle deformable objects better or performing online adaptation after training,  
77 which is out of the scope of our work.

78 In the *push chair*, *laundry door closing*, and *bimanual folding* tasks, the majority of failures come  
79 from the end-effector not performing the full motion or not performing gripper open close actions  
80 at the right time. This most likely happens because the errors in predicted actions accumulated and  
81 the observation became too out-of-distribution scenarios for the policy to behave correctly. In the  
82 *bimanual make bed* task, our object segmentation algorithm appears to be more finicky than other  
83 tasks, not segmenting the full comforter in some scenarios since the folded comforter looks like  
84 two objects. This results in the policy sometimes not giving nice inference results, giving rise to  
85 execution failures.

## 86 C Method Architectures and Implementation Detail

87 In this section, we describe in detail the architecture of our method. We visualize the architecture of  
88 our model in Figure 3.

89 **Observation and action spaces.** In all simulated and real robot tasks except for *Push T*, we use a 13-  
90 dimensional proprioception information and a 7-dimensional action space for each robot. The pro-  
91 prioception data for each robot consists of the following information: a 3-dimensional end-effector  
92 position, a 6-dimensional vector denoting end-effector orientation (represented by two columns of  
93 the end-effector rotation matrix), a 3-dimensional vector indicating the direction of gravity, and a  
94 scalar that represents the degree to which the gripper is opened. The action space for each robot  
95 consists of the following information: a 3-dimensional vector for the end-effector position veloc-  
96 ity, a 3-dimensional vector for the end-effector angular velocity in axis-angle format, and a scalar  
97 denoting the gripper action.

98 In the *Push T* task, the robot proprioception is 3-dimensional and consists of the agent’s 3D position  
99 in the scene, while the action space is 3-dimensional and denotes the absolute position target of the  
100 agent.

101 In all simulated and real robot tasks, our policy uses an observation horizon of 2 steps, a prediction  
102 horizon of 16 steps, and an action horizon of 8 steps. This is identical to the setup used in the  
103 diffusion policy paper [4].

104 **Encoder architecture.** In all tasks except for *Push T*, we use a SIM(3)-equivariant version of  
105 PointNet++ with 4 layers and hidden dimensionality 128. In the *Push T* task, we decrease the  
106 number of layers to 2 since the number of points in the point cloud observation is much smaller in  
107 this task.

108 **Noise prediction network.** Our noise prediction network inherits hyperparameters from the original  
109 Diffusion Policy paper. In all simulation experiments, we use the DDPM scheduler [16] and perform  
110 100 denoising steps during inference. In real robot experiments, to optimize for inference speed, we  
111 use the DDIM scheduler [17] with 8 denoising steps.

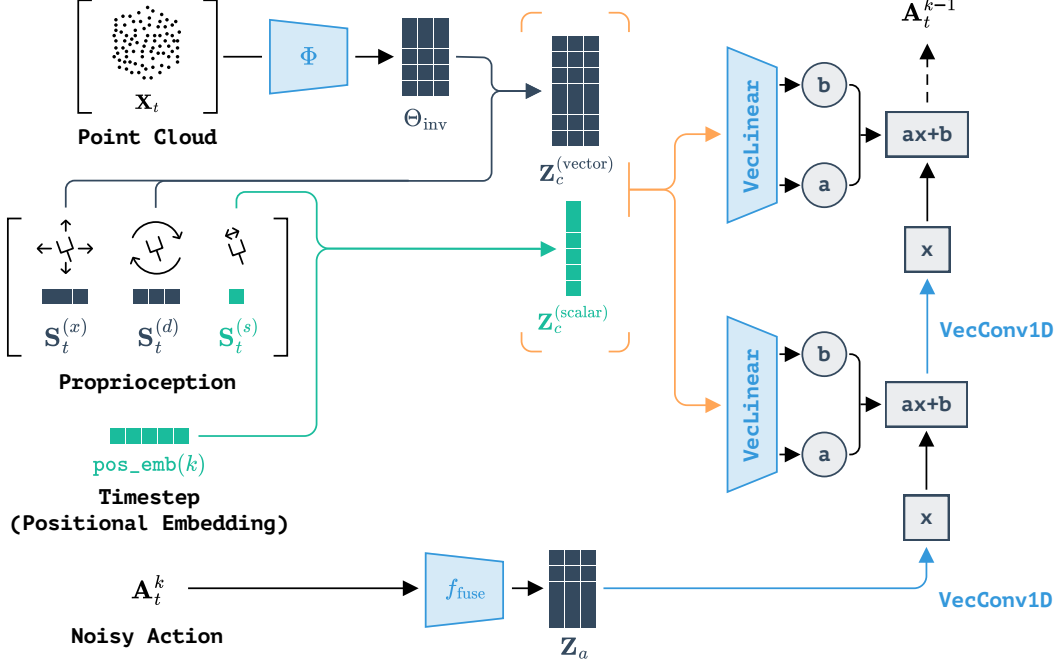

Figure 3: **Architecture of EquiBot.** Given input scene point cloud, robot proprioception, noisy actions, and the diffusion timestamp, our architecture processes position, direction, and scalar information independently, uses the encoder outputs to scale position information into position and scale invariant values, and then routes them into an SO(3)-equivariant conditional U-net to predict denoised actions. In the figure, we omit scaling for the ease of viewing. VecLinear and VecConv1D refer to a SO(3)-equivariant version of linear and convolution 1D layers.

122 **Point cloud size.** Picking the number of points to sample in the point cloud observation is a key  
 123 hyperparameter to consider when designing an architecture that takes point cloud inputs. In our  
 124 experiments, we found out that using 512 or 1024 points is sufficient for all tasks. In particular,  
 125 for all real robot experiments and simulated mobile manipulation tasks, we use 1024-point point  
 126 clouds. In *Can* and *Square* tasks, we use 256 and 512 points respectively since there is relatively  
 127 more training data in these tasks, and decreasing the number of points in the point cloud makes  
 128 training faster without hurting performance.

## 119 D Real Robot Setup Details

### 120 D.1 Human Demo Parsing Infrastructure

121 We use a single Zed 2 camera to record human natural motion in real-time, which is way more  
 122 flexible and time-efficient than the expert demonstration from human teleoperation of a robot.

123 We assume access to a dataset  $\mathcal{D} = \{\tau^n\}_{n=1}^N$  of human demonstrations. Each human demonstration  
 124 consists of a series of RGB-D image frames  $\tau^n = \{I_t^n\}_{t=1}^T$ , where  $T$  is the episode horizon. The  
 125 human demonstration processing module has three parts: (1) an off-the-shelf object detection and  
 126 tracking model  $\mathbf{X}_t^n = \Psi(I_t^n, I_{t-1}^n)$  that takes the current and previous demonstration frames  $I_t^n$   
 127 and  $I_{t-1}^n$  (if existing) as input and outputs a parsed point cloud of objects of interest  $\mathbf{X}_t^n$ ; (2) an  
 128 off-the-shelf hand detection model  $\mathbf{H}_t^n = \Phi(I_t^n)$  that takes the current demonstration frame as input  
 129 and outputs the keypoints on each human hand in the input frame  $\mathbf{H}_t^n$ ; and (3) an alignment module  
 130  $\Omega(\mathbf{X}_t^n, \mathbf{H}_t^n, I_t^n)$  that takes the outputs of the previous two steps as input, aligns the 3D coordinates  
 131 of the outputs, and outputs the aligned human finger pose  $\mathbf{y}_t^n$  in the same coordinate system of  $\mathbf{X}_t^n$ .  
 132 We use Grounded Segment Anything Model with DEVA [18] as the object detection and tracking  
 133 model  $\Psi$  and HaMeR [19] as the hand detection model  $\Phi$ . In the alignment module, we find a set of

134 matching points between the point cloud  $\mathbf{X}_t^n$  and  $\mathbf{H}_t^n$ , and then fit a rotation transformation  $R_h$  and  
 135 an offset  $t_h$  to transform all points  $\mathbf{H}_t^n$  to the coordinate frame of the point cloud. Then, we extract  
 136 the thumb and index finger positions on the transformed keypoint set to predict the human “end-  
 137 effector” pose  $\mathbf{y}_t^n$ . We found that the alignment module  $\Omega$  is crucial, as the hand detection model  
 138 produces hand poses in a different coordinate frame from the point cloud. Without this module, the  
 139 resulting hand poses will not align with the object point cloud.

## 140 D.2 Mobile Robot Control Infrastructure

141 Our robot control setup consists of a centralized workstation and two mobile robots. The workstation  
 142 reads and parses visual observations, performs policy inference, and communicates with the robots.  
 143 The mobile robots take the output actions of the policy and execute them.

144 On the workstation side, we build a multi-processed infrastructure to handle observation parsing,  
 145 policy inference, and action execution separately. To reduce latency, we keep spinning the obser-  
 146 vation parsing and policy inference processes. We use shared memory to communicate between  
 147 different processes.

148 In the observation parsing process, we obtain visual observations from a single Zed 2 camera di-  
 149 rectly connected to the workstation via cable. We use the Grounded Segment Anything Model with  
 150 DEVA [18] to obtain segmented point clouds that contain only relevant objects in the scene. We  
 151 then downsample this segmented point cloud to 1024 points. The downsampled point cloud and  
 152 the robot proprioceptive information are sent to the policy inference process. The policy inference  
 153 process then outputs a sequence of 16 predicted actions.

154 In the action execution process, we first reset all robots to their initial poses. Then, for each step  
 155 in an evaluation episode, we read out the latest policy inference results from the policy inference  
 156 process. To ensure accurate execution, we compute the elapsed time between the policy input time  
 157 and action execution time. If this elapsed time exceeds a threshold, we skip the first few predicted  
 158 actions during action execution. After skipping the first few predicted actions to account for latency,  
 159 we select the 8 actions that immediately follow the skipped actions to execute. This means that no  
 160 matter how many actions are skipped, we always execute 8 actions at a time.

161 On the mobile robot, we also build a multi-processed control infrastructure and use shared memory  
 162 to communicate between different processes. There is a server process that captures all requests  
 163 from the clients and stores the command in shared memory to control the Kinova arm and mobile  
 164 base. As the arm and base operate at different frequencies, we decouple the control for those two  
 165 components but always ask the Kinova arm end-effector to track the expected global pose whenever  
 166 possible, no matter what the base pose is.

167 We utilize the mocap system in the room to update the mobile base position at 120 Hz. Then, we (1)  
 168 transfer each control signal from the global world frame to the local frame of the Kinova arm, (2)  
 169 convert the target pose at the gripper fingertip to an expected pose of the Kinova end-effector, and  
 170 (3) convert it into a velocity command for the arm. To ensure safe execution, a timeout callback will  
 171 stop the arm movement when no new velocity commands arrive for 4 times the expected execution  
 172 time interval. Unlike the control of the Kinova arm, we use position control for the mobile base and  
 173 will only move it when the robot end-effector is too close to or too far from the base. To ensure  
 174 safety, we define task-specific polygons workspace boundaries for the Kinova arm and the mobile  
 175 base separately, so that all motions are constrained within a safe region.

176 In future work, we will explore more principled whole-body control architecture to avoid decoupling  
 177 the arm and base motion.

## 178 D.3 Task Details

179 **Push chair.** In this task, the human demonstrations are collected using a standing desk ( $48 \times 30$   
 180 inches). The policies are evaluated on two different tables: a longer rectangular desk ( $58 \times 23$  inches)

| Number of Demos →         | Ours   |       |       | DP      |        |        |
|---------------------------|--------|-------|-------|---------|--------|--------|
|                           | 10     | 25    | 50    | 10      | 25     | 50     |
| Success Rate              | 8/10   | 9/10  | 10/10 | 3/10    | 5/10   | 7/10   |
| Close with Click Sound    | 2/10   | 2/10  | 5/10  | 2/10    | 1/10   | 5/10   |
| Total Missing Angle       | 17.46° | 7.18° | 6.3°  | 140.42° | 33.85° | 21.55° |
| Collision or Safety Issue | 0/10   | 0/10  | 0/10  | 2/10    | 0/10   | 0/10   |

Table 1: Detailed performance of the laundry door closing task.

181 and a circular table (diameter of 36 inches). An episode is considered successful if the center of the  
182 chair goes beneath the desk.

183 **Luggage packing.** In the human demonstrations, a human picks up a pack of white t-shirts and  
184 places them into a white carry-on luggage. At evaluation time, we test four different packing items:  
185 white t-shirts (same as training object), gray towel roll, blue cap, and navy shorts. An episode is  
186 considered successful if at least half of the packed object ends up within the luggage.

187 **Luggage closing.** In this task, human demonstrations are collected on a small carry-on luggage  
188 ( $55 \times 40 \times 23$  cm), while the policies are evaluated on a large check-in luggage ( $76 \times 48 \times 25$  cm).  
189 An episode is considered successful if the luggage ends up in a closed state.

190 **Laundry door closing.** In this task, the human demonstrations and the robot work with the same  
191 laundry machine (front-loader). The goal is to close the door of the laundry machine that is open at  
192 the start of the episode. An episode is considered successful if the door ends up with an opening of  
193 at most 5cm.

194 **Bimanual folding.** In this task, the human demonstrations are collected by using two hands to fold  
195 a small piece of cloth ( $34 \times 38$  cm). At evaluation time, the robot is asked to fold a large gray towel  
196 ( $140 \times 75$  cm). After each evaluation episode, we measure the mean distance between each grasped  
197 corner to their corresponding target cloth corners and mark the episode as successful if this mean  
198 distance is less than 0.2 times the length of the folding side of the cloth.

199 **Bimanual make bed.** In this task, the human demonstrations are collected by using two hands to  
200 unfold a towel ( $34 \times 38$  cm). At evaluation time, the robot is asked to make the bed by unfolding  
201 a much larger comforter on top of the bed. After each evaluation episode, we measure the mean  
202 distance between each grasped corner to the bed board and mark the episode as successful if this  
203 mean distance is less than 0.2 times the length of the bed.

## 204 E Additional Real Robot Results

205 **Detailed performance analysis of the laundry door closing task.** To understand the performance  
206 of the Diffusion Policy [4] and our method better, we perform a more detailed analysis in the laundry  
207 door closing task. In Table 1, we report four different metrics of policy performance in each evalua-  
208 tion setup. *Success Rate* measures the percentage of evaluations that end within the success criteria  
209 we set; *Close with Click Sound* measures the percentage of episodes that end with the laundry door  
210 closed completely after making a clicking sound; *Total Accumulated Missing Angle* measures the  
211 sum of the opening angles of the laundry door at the end of the 10 evaluation episodes; *Collision*  
212 *or Safety Issue* measures the percentage of evaluation runs that are terminated because of undesired  
213 collisions or critical safety issues, such as the robot arm getting stuck at the laundry door. From  
214 the evaluation results, we see that the *DP* policy not only has a lower success rate but also has a  
215 much larger accumulated missing angle. The baseline also suffers from many safety issues requir-  
216 ing episodes to be manually terminated by the robot operator. Our method has much fewer safety  
217 issues when it executes.

218 **Qualitative results.** In Figure 4, we show qualitative rollout samples for all evaluation scenarios  
219 we mentioned in the paper, plus one bonus task where two robots lift a woven basket onto a coffee  
220 table.

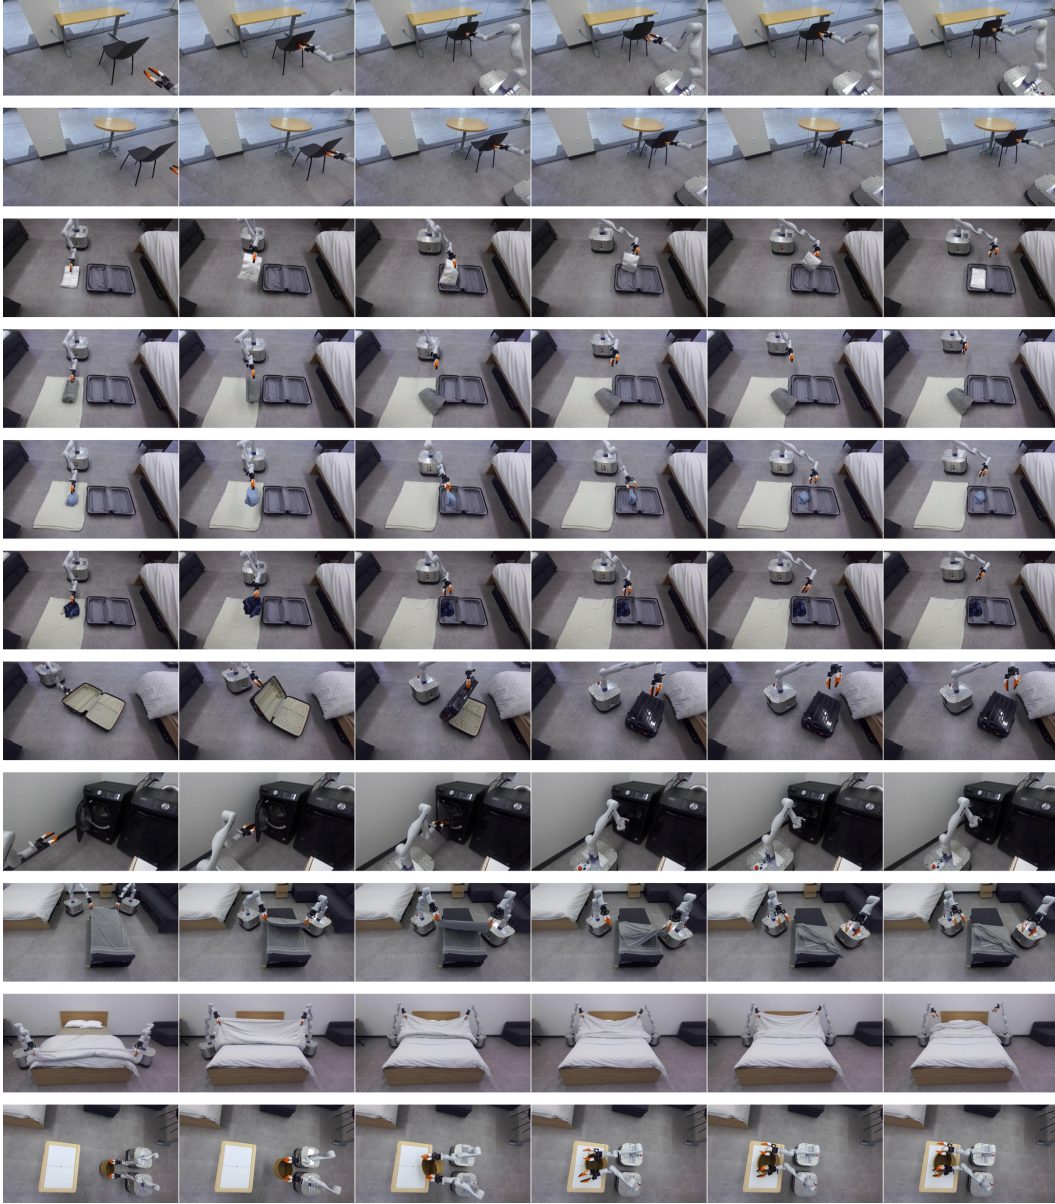

Figure 4: **Qualitative rollout samples for all real robot evaluation scenarios.** From top to bottom, we have: (1) pushing a chair towards a long standing desk; (2) pushing a chair towards a circular table; (3) packing t-shirts; (4) packing towel roll; (5) packing cap; (6) packing shorts; (7) closing a check-in luggage; (8) closing laundry door; (9) bimanual folding; (10) bimanual make bed; (11) a bonus task where two robots lift a woven basket onto a coffee table.

## 221 F Simulation Experiment Task Details

222 **Cloth folding.** In this task, the demonstrations show two robots folding a piece of cloth ( $27.5 \times 27.5$   
 223 cm). During an evaluation, we compute the task reward as  $1.0 - (d_1 + d_2)/(0.275 \times 2)$ , where  $d_1$   
 224 and  $d_2$  denote the distance from the two grasped cloth corners to the target cloth corners.

225 **Object covering.** In this task, the demonstrations show two robots moving a piece of cloth ( $27.5 \times$   
 226  $27.5$  cm) onto a rigid box ( $10 \times 7 \times 5$  cm). During an evaluation, the task reward is computed as  
 227  $V_{\text{intersect}}/V_{\text{convex hull}}$ , where  $V_{\text{intersect}}$  is the volume intersection between the box and the convex hull of  
 228 the cloth and  $V_{\text{convex hull}}$  is the volume of the convex hull of the cloth.

229 **Box closing.** In this task, the demonstrations show two robots closing a box ( $14.5 \times 12 \times 11.5$  cm)  
230 with three flaps. Success in this task is evaluated as  $(a_1 + a_2 + a_3)/(3 \times 180)$ , where  $a_1$  to  $a_3$  denote  
231 the angle in degrees at which each flap of the box is closed.

232 **Push T.** In this task, a 2D anchor pushes a T shaped object on a plane of dimension  $512 \times 512$  pixels.  
233 The task reward is computed as the percentage of the T shape that overlaps with the target T pose.

234 **Robomimic tasks.** We use the same object and reward specifications in these tasks as the original  
235 benchmark. Please check out the Robomimic [\[1\]](#) paper for more details.

## References

- [1] A. Mandlekar, D. Xu, J. Wong, S. Nasiriany, C. Wang, R. Kulkarni, L. Fei-Fei, S. Savarese, Y. Zhu, and R. Martín-Martín. What matters in learning from offline human demonstrations for robot manipulation. In *arXiv preprint arXiv:2108.03298*, 2021.
- [2] A. Brohan, N. Brown, J. Carbajal, Y. Chebotar, J. Dabis, C. Finn, K. Gopalakrishnan, K. Hausman, A. Herzog, J. Hsu, et al. Rt-1: Robotics transformer for real-world control at scale. *arXiv preprint arXiv:2212.06817*, 2022.
- [3] J. Yang, J. Zhang, C. Settle, A. Rai, R. Antonova, and J. Bohg. Learning periodic tasks from human demonstrations. *IEEE International Conference on Robotics and Automation (ICRA)*, 2022.
- [4] C. Chi, S. Feng, Y. Du, Z. Xu, E. Cousineau, B. Burchfiel, and S. Song. Diffusion policy: Visuomotor policy learning via action diffusion. In *Proceedings of Robotics: Science and Systems (RSS)*, 2023.
- [5] Y. Ze, G. Zhang, K. Zhang, C. Hu, M. Wang, and H. Xu. 3d diffusion policy: Generalizable visuomotor policy learning via simple 3d representations. In *Proceedings of Robotics: Science and Systems (RSS)*, 2024.
- [6] E. Hoogeboom, V. G. Satorras, C. Vignac, and M. Welling. Equivariant diffusion for molecule generation in 3d. In *International conference on machine learning*, pages 8867–8887. PMLR, 2022.
- [7] J. Guan, W. W. Qian, X. Peng, Y. Su, J. Peng, and J. Ma. 3d equivariant diffusion for target-aware molecule generation and affinity prediction. *arXiv preprint arXiv:2303.03543*, 2023.
- [8] I. Igashov, H. Stärk, C. Vignac, A. Schneuing, V. G. Satorras, P. Frossard, M. Welling, M. Bronstein, and B. Correia. Equivariant 3d-conditional diffusion model for molecular linker design. *Nature Machine Intelligence*, pages 1–11, 2024.
- [9] A. Schneuing, Y. Du, C. Harris, A. Jamasb, I. Igashov, W. Du, T. Blundell, P. Lió, C. Gomes, M. Welling, et al. Structure-based drug design with equivariant diffusion models. *arXiv preprint arXiv:2210.13695*, 2022.
- [10] H. Ryu, J. Kim, J. Chang, H. S. Ahn, J. Seo, T. Kim, J. Choi, and R. Horowitz. Diffusion-edfs: Bi-equivariant denoising generative modeling on se (3) for visual robotic manipulation. *arXiv preprint arXiv:2309.02685*, 2023.
- [11] J. Brehmer, J. Bose, P. De Haan, and T. S. Cohen. Edgi: Equivariant diffusion for planning with embodied agents. *Advances in Neural Information Processing Systems*, 36, 2024.
- [12] H. Huang, D. Wang, R. Walters, and R. Platt. Equivariant transporter network. *arXiv preprint arXiv:2202.09400*, 2022.
- [13] H. Huang, O. Howell, X. Zhu, D. Wang, R. Walters, and R. Platt. Fourier transporter: Bi-equivariant robotic manipulation in 3d. *arXiv preprint arXiv:2401.12046*, 2024.
- [14] D. Wang, R. Walters, and R. Platt. So(2)-equivariant reinforcement learning. *arXiv preprint arXiv:2203.04439*, 2022.
- [15] M. Jia, D. Wang, G. Su, D. Klee, X. Zhu, R. Walters, and R. Platt. Seil: Simulation-augmented equivariant imitation learning. In *2023 IEEE International Conference on Robotics and Automation (ICRA)*, pages 1845–1851. IEEE, 2023.
- [16] J. Ho, A. Jain, and P. Abbeel. Denoising diffusion probabilistic models. *Advances in neural information processing systems*, 33:6840–6851, 2020.

- 279 [17] J. Song, C. Meng, and S. Ermon. Denoising diffusion implicit models. *arXiv preprint*  
280 *arXiv:2010.02502*, 2020.
- 281 [18] H. K. Cheng, S. W. Oh, B. Price, A. Schwing, and J.-Y. Lee. Tracking anything with decoupled  
282 video segmentation. In *ICCV*, 2023.
- 283 [19] G. Pavlakos, D. Shan, I. Radosavovic, A. Kanazawa, D. Fouhey, and J. Malik. Reconstructing  
284 hands in 3D with transformers. In *CVPR*, 2024.
